# Supplementary material for: Community-level impacts of spatial repellents for control of diseases vectored by Aedes aegypti mosquitoes
Source: PLoS Comput Biol. 2020 Sep 25;16(9):e1008190. doi: 10.1371/journal.pcbi.1008190 (PMC7541056; doi:10.1371/journal.pcbi.1008190)
Supplement: S4 Table — (DOCX) [file pcbi.1008190.s012.docx]

**S4 Table. Survival functions.**

| Model | Probability density function (f(t)) | Survival function | Parameters | With covariates | Mean (95% Confidence interval: lower bound, higher bound) | AIC | | ΔAIC |
| --- | --- | --- | --- | --- | --- | --- | --- | --- |
| Exponential |  |  | *λ* =rate |  | *βcontrol=*2.94 (2.86, 3.02)  *β1ow=* -0.29(-0.49, -0.08)  *βhigh=* -0.63(-0.85, -0.41) | | 8626 | 1222 |
| Weibull |  |  | *λ*=rate  *v =* shape |  | *ν =* 2.70 (2.57, 2.84)  *βcontrol=*3.04 (3.01, 3.07)  *βlow=*--0.31(-0.38, -0.23)  *βhigh=*-0.49(-0.57, -0.41) | | 7558 | 154 |
| Log-normal |  |  | *μ* = location  σ= scale |  | σ *=*0.58(0.55, 0.60)  *βcontrol=*2.84 (2.80, 2.89)  *βlow=*-0.28(-0.40, -0.16)  *βhigh=*-0.87(-0.99, -0.74) | | 8051 | 646 |
| Gamma |  | No closed form | *λ*=rate  κ *=* shape |  | κ = 4.14 (3.83, 4.48)  *βcontrol=* 0.22(0.20, 0.24)  *β1ow=*0.29(0.19, 0.39)  *βhigh=*0.63(0.52, 0.74) | | 7776 | 372 |
| Generalized Gamma |  |  | *λ* =rate  *v* =shape 1  *κ* = shape 2 |  | κ = 0.21 (0.16, 0.26)  *ν =* 8.82 (7.38, 10.53)  *βcontrol=* 29.46(28.64, 30.30)  *βlow=*-0.33(-0.38, -0.28)  *βcontrol=*-0.36(-0.42, -0.30) | | 7404 | 0 |
